# Supplementary material for: Easily accessible polymer additives for tuning the crystal-growth of perovskite thin-films for highly efficient solar cells
Source: Royal Society of Chemistry journal article supplement (doi:10.1039/c6nr00206d), 2016-01-01
Supplement: c6nr00206d1.pdf [file c6nr00206d1.pdf]

## Supplementary Information

### Easy accessible polymer additive in tuning the crystal-growth of perovskite thin-film for high efficient solar cell

Qingqing Dong, Zhaowei Wang, Kaicheng Zhang, Hao Yu, Peng Huang, Xiaodong Liu,  
Yi Zhou\*, Ning Chen\*, and Bo Song\*

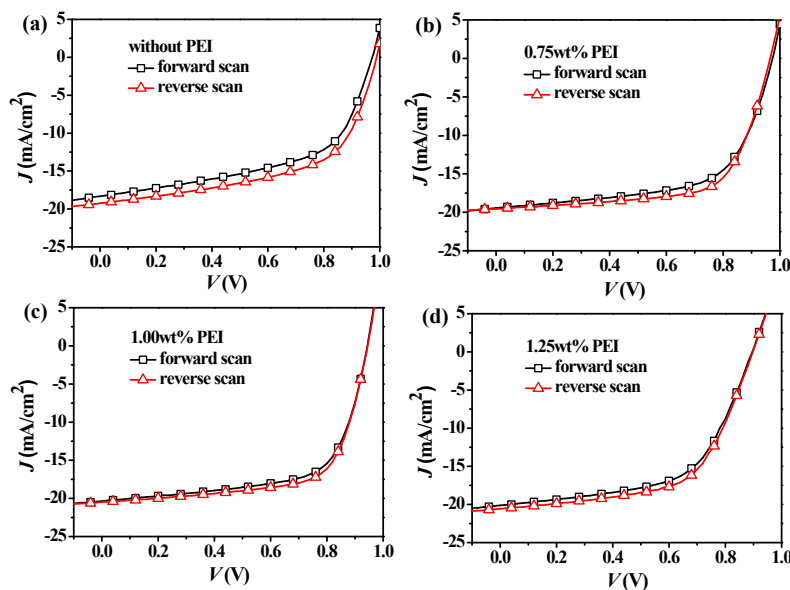

Fig. S1.  $J$ - $V$  curves of Pero-SCs obtained by reverse and forward scanning directions with different amount of PEI additives: (a) 0, (b) 0.75 wt%, (c) 1.00 wt%, (d) 1.25 wt%.

Table S1.  $J$ - $V$  characteristics of Pero-SCs obtained by reverse and forward scanning directions with different amount of PEI additives: (a) 0, (b) 0.75 wt%, (c) 1.00 wt%, (d) 1.25 wt%.

| Weight ratios of PEI (wt%)<br>(scan directions) | $V_{oc}$ (V) | $J_{sc}$ ( $\text{mA cm}^{-2}$ ) | FF (%) | PCE (%) |
|-------------------------------------------------|--------------|----------------------------------|--------|---------|
| 0 (forward)                                     | 0.97         | 18.33                            | 54.9   | 9.79    |
| 0 (reverse)                                     | 0.98         | 19.24                            | 56.8   | 10.80   |
| -----                                           |              |                                  |        |         |
| 0.75 (forward)                                  | 0.97         | 19.43                            | 62.4   | 11.82   |
| 0.75 (reverse)                                  | 0.96         | 19.60                            | 66.9   | 12.64   |
| -----                                           |              |                                  |        |         |
| 1.00 (forward)                                  | 0.94         | 20.36                            | 65.3   | 12.55   |
| 1.00 (reverse)                                  | 0.94         | 20.48                            | 67.8   | 13.09   |
| -----                                           |              |                                  |        |         |
| 1.25 (forward)                                  | 0.89         | 20.12                            | 57.9   | 10.45   |
| 1.25 (reverse)                                  | 0.90         | 20.56                            | 59.6   | 10.99   |

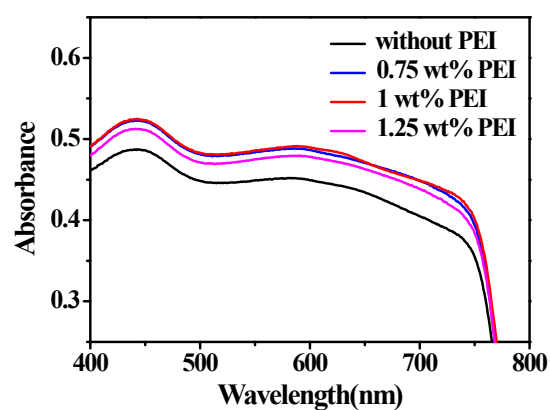

Fig. S2. Absorption spectra of ITO/PEDOT:PSS/perovskite (430 nm) thin-films (a) without PEI (b) with 1.00 wt% of PEI.

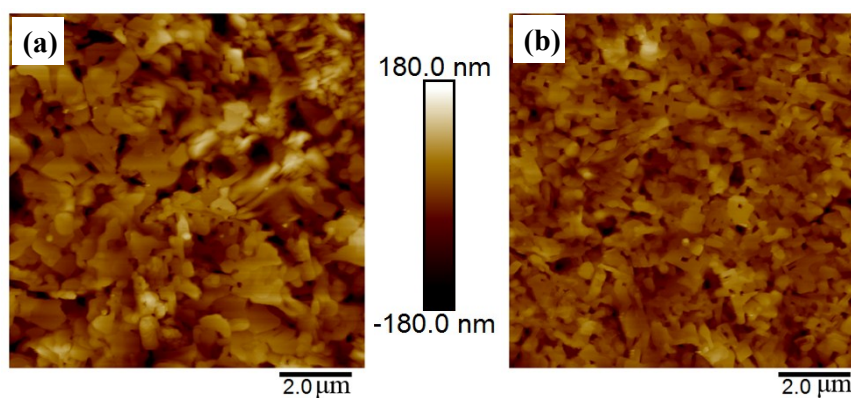

Fig. S3. AFM height images of perovskite thin-films on ITO/PEDOT:PSS (a) without PEI (b) with 1.00 wt% of PEI. The rms values extracted from the respective images are 43.29 and 18.43 nm.
